# Supplementary material for: Comparative study of Low-grade metamorphic Precambrian supracrustal rocks and HP–UHP Rocks in the South Altyn Tagh: Insights into subduction-exhumation
Source: Copernicus journal article supplement (doi:10.5194/egusphere-2025-4830), 2025-10-07
Supplement: Supplementary file 1 [file Supplemental file——Analytical method.doc]

**Supplementary materials**

# Analytical method

Analytical work was conducted at the Wuhan SampleSolution Analytical Technology Co., Ltd and the State Key Laboratory of Continental Evolution and Early Life, Northwest University, P.R.China.

## S1.1. Zircon U-Pb dating and trace-element

Zircon separation employed conventional density and magnetic separation techniques, followed by meticulous grain selection for target preparation. Cathodoluminescence (CL) characterization was performed using Quanta 400FEG environmental scanning electron microscope equipped with an Oxford energy dispersive spectroscopy system and Gatan CL3+ detector. Zircons U-Pb isotopes and trace element were analysed using LA-ICP-MS system comprising an Agilent 7500c coupled to a 193 nm ArF Excimer laser with automatic positioning. Analytical protocols included: a, Instrument optimization using standard NIST 610 synthetic silicate glass; b, External calibration standard reference Harvard zircon 91500; c, Internal standardization using 29Si for elemental quantification; d, Analysis spots of 24 μm diameter with 20–40 μm penetration depth. Data incorporated ICPMSDataCal 8.6 for isotopic ratio calculations, while age determination and concordia plot generation employed ISOPLOT 3.0(Ludwing, 2003). Detailed analysis steps and data processing methods are presented in Yuan et al. (2004).

## S1.2. Major and trace element analyses of whole rock

The sample pretreatment was conducted using a fusion technique with a flux mixture composed of lithium tetraborate, lithium metaborate, and lithium fluoride in a ratio of 45:10:5. Ammonium nitrate was employed as the oxidant, while lithium bromide served as the releasing agent. The fusion process was carried out at 1050 ℃ for 15 minutes. Subsequent analysis was performed using a ZSX Primus II wavelength-dispersive X-ray fluorescence spectrometer (WD-XRF, Rigaku Corporation, Japan) equipped with a 4.0 kW end-window Rhodium target X-ray tube. The instrument was operated at an accelerating voltage of 50 kV and a tube current of 60 mA.

Trace element compositions were determined using an Agilent 7700e ICP-MS. The sample digestion procedure included: (1) drying 200-mesh powder at 105 ℃ for 12 hours; (2) digesting 50mg sample with HNO₃ (1 ml) and HF (1 ml) in a Teflon bomb (190 ℃, > 24 hours); (3) evaporation and redissolution with HNO₃ (1 ml); (4) addition of In internal standard and final digestion (190 ℃, >12 hours); (5) dilution to 100g with 2% HNO₃ for analysis.

For further technical details regarding the analytical methodology, please refer to the manufacturer's official website (www.samplesolution.cn, available in English).
