# Supplementary material for: Comparative study of Low-grade metamorphic Precambrian supracrustal rocks and HP–UHP Rocks in the South Altyn Tagh: Insights into subduction-exhumation
Source: Copernicus journal article supplement (doi:10.5194/egusphere-2025-4830), 2025-10-07
Supplement: Supplementary file 3 [file Supplemental file——Table S1-S14.xls]

## Sheet: Table S1
Table S1 LA-ICP-MS U-Pb isotopic data of zircons from sample 16A72
Spot No.	Content (ppm)		Th/U	Isotopic Ratios						Age (Ma)						Concordance
	232Th	238U		207Pb/206Pb	1σ	207Pb/235U	1σ	206Pb/238U	1σ	207Pb/206Pb	1σ	207Pb/235U	1σ	206Pb/238U	1σ
16A72	202.339	183.993	1.09971	0.069168	0.00178588	1.41144	0.0619534	0.146364	0.00111139	905.555	58.335	893.764	26.0924	880.548	6.24974	98%
16A72	156.94	348.424	0.450428	0.0681654	0.00142425	1.41992	0.071695	0.149031	0.00130206	873.76	42.5925	897.329	30.0916	895.53	7.30493	99%
16A72	165.006	463.235	0.356203	0.0701926	0.0013159	1.4587	0.0480296	0.149066	0.00136377	1000	38.89	913.47	19.8376	895.728	7.65093	98%
16A72	136.638	306.566	0.445704	0.0687837	0.00140806	1.4343	0.0564813	0.149175	0.00116823	892.28	75.0025	903.344	23.5635	896.336	6.5533	99%
16A72	211.047	240.087	0.879044	0.0643562	0.00133265	1.34235	0.0768279	0.149509	0.00124381	753.71	44.44	864.25	33.3159	898.211	6.97525	96%
16A72	334.208	454.525	0.735291	0.0693275	0.00115286	1.44241	0.04913	0.14987	0.00127534	909.26	34.415	906.723	20.4276	900.236	7.14983	99%
16A72	270.248	234.51	1.1524	0.0676824	0.00154061	1.42208	0.0677009	0.150502	0.00125773	858.94	47.3775	898.235	28.389	903.779	7.0472	99%
16A72	133.488	215.936	0.618184	0.0723773	0.00166025	1.53805	0.0604728	0.152921	0.00119203	998.15	46.3025	945.725	24.1975	917.315	6.66512	96%

## Sheet: Table S2
Table S2 Trace elements data of zircons from sample 16A72
Spot No.	La	Ce	Pr	Nd	Sm	Eu	Gd	Tb	Dy	Ho	Er	Tm	Yb	Lu
16A72	29.7517	75.2204	9.09946	44.2064	21.4127	1.56601	72.6651	21.1999	222.945	77.2065	310.504	58.698	517.987	102.215
16A72	0.0829153	5.21369	0.144447	2.81018	7.23024	0.556243	44.5192	16.5694	200.767	78.0792	331.871	67.5139	591.796	116.764
16A72	0.483937	4.75074	0.666441	4.5992	6.51213	0.223821	42.6734	17.5074	222.012	87.7762	396.554	84.101	744.929	150.442
16A72	3.87108	17.0063	1.29699	7.84809	5.50913	0.33661	30.0756	11.0937	137.9	53.9523	242.925	50.4429	442.949	88.6742
16A72	0.794458	7.08365	0.860861	9.81516	14.3342	1.16404	70.0352	22.4528	250.373	90.1171	368.59	72.9525	628.414	122.243
16A72	0.0444354	7.0873	0.332935	6.17651	13.0037	0.936927	83.8526	27.259	323.281	117.757	504.034	100.487	852.971	166.472
16A72	0.0735589	8.65775	0.389379	8.60862	14.9889	2.36553	87.7666	28.5366	337.654	131.481	579.828	117.594	1032.92	204.799
16A72	0.0261847	4.80194	0.228398	3.60686	8.00004	1.0099	43.7702	14.6092	169.401	63.0746	274.394	56.1918	480.792	98.361

## Sheet: Table S3
Table S3 LA-ICP-MS U-Pb isotopic data of zircons from sample 17A10
Spot No.	Content (ppm)		Th/U	Isotopic Ratios						Age (Ma)						Concordance
	232Th	238U		207Pb/206Pb	1σ	207Pb/235U	1σ	206Pb/238U	1σ	207Pb/206Pb	1σ	207Pb/235U	1σ	206Pb/238U	1σ
17A10	198.757	862.744	0.230377	0.0693363	0.000671886	1.47909	0.0227616	0.154575	0.00185574	909.26	19.5975	921.859	9.32293	926.557	10.3613	99%
17A10	980.084	1852.67	0.529012	0.0712576	0.000775601	1.52222	0.019634	0.154599	0.000773459	964.81	22.225	939.37	7.90431	926.69	4.31841	98%
17A10	193.119	535.587	0.360575	0.0712084	0.000696891	1.52083	0.0181456	0.154669	0.000741922	964.81	20.3725	938.813	7.3091	927.085	4.14208	98%
17A10	256.601	899.614	0.285235	0.0688629	0.000441425	1.47459	0.0171091	0.154961	0.000919949	894.445	14.045	920.012	7.0204	928.71	5.1347	99%
17A10	285.09	1171.18	0.243421	0.0701764	0.000622491	1.50125	0.0199334	0.155087	0.00154973	1000	17.4375	930.895	8.09214	929.414	8.64891	99%
17A10	175.806	620.672	0.283251	0.0698001	0.000844058	1.49924	0.0282915	0.155263	0.00170019	924.07	24.07	930.079	11.4947	930.4	9.48713	99%
17A10	284.164	1119.75	0.253776	0.0710028	0.000681237	1.52427	0.0179645	0.155363	0.000919841	966.665	18.985	940.196	7.22632	930.954	5.13231	99%
17A10	297.261	862.502	0.344649	0.0681551	0.00087972	1.4623	0.0221415	0.155369	0.000870872	872.215	22.07	914.956	9.13077	930.987	4.85906	98%
17A10	658.138	1478.16	0.445241	0.070149	0.000361037	1.50542	0.0134468	0.155384	0.000648807	933.02	10.34	932.583	5.44972	931.075	3.61999	99%
17A10	356.137	1021.05	0.348795	0.0692351	0.000363938	1.48759	0.0156566	0.155724	0.000851653	905.555	11.11	925.332	6.39081	932.97	4.75036	99%
17A10	582.87	1529.98	0.380966	0.0703475	0.000313843	1.5144	0.0134799	0.155746	0.000759394	938.885	9.255	936.219	5.44359	933.095	4.23568	99%
17A10	442.055	928.731	0.475977	0.0701673	0.00127691	1.50967	0.0339235	0.155806	0.0020612	933.02	37.8075	934.304	13.7259	933.43	11.4962	99%
17A10	287.733	912.131	0.315451	0.0699427	0.000440251	1.50595	0.016105	0.155867	0.000850421	927.775	8.3325	932.801	6.52565	933.767	4.7429	99%
17A10	255.808	818.634	0.312482	0.0713585	0.000433565	1.53618	0.0165132	0.155954	0.000765128	968.515	16.825	944.977	6.61131	934.255	4.26689	98%
17A10	199.145	735.629	0.270713	0.070638	0.000552539	1.52049	0.0206997	0.156065	0.00148712	946.29	15.585	938.676	8.33907	934.872	8.29243	99%
17A10	120.735	548.088	0.220284	0.0701498	0.000839714	1.51265	0.027124	0.156336	0.00172885	933.02	28.7025	935.512	10.9615	936.383	9.63809	99%
17A10	369.254	949.064	0.389072	0.0711434	0.000411017	1.5354	0.0167937	0.156355	0.00100291	961.11	11.5775	944.662	6.7257	936.489	5.59098	99%
17A10	334.783	870.095	0.384766	0.0700196	0.0004168	1.51292	0.0158425	0.156416	0.000691039	928.7	12.9625	935.62	6.40147	936.829	3.85218	99%
17A10	142.737	758.957	0.18807	0.0714738	0.00109458	1.54233	0.0244321	0.156477	0.0012546	972.225	36.1125	947.433	9.75827	937.167	6.99338	98%
17A10	222.662	735.269	0.30283	0.068791	0.00113152	1.49096	0.0287849	0.157253	0.00166762	892.28	35.1875	926.707	11.734	941.495	9.28939	98%
17A10	186.892	739.597	0.252694	0.0704855	0.00045123	1.53238	0.0168168	0.157394	0.000847293	942.59	18.6725	943.454	6.74297	942.28	4.71922	99%

## Sheet: Table S4
Table S4 Trace elements data of zircons from sample 17A10
Spot No.	La	Ce	Pr	Nd	Sm	Eu	Gd	Tb	Dy	Ho	Er	Tm	Yb	Lu
17A10	0.0581274	4.41303	0.154429	2.1632	4.51728	0.198566	30.2333	11.7901	158.571	62.8398	325.485	66.0795	723.665	129.556
17A10	0.126805	9.46932	0.187596	2.66995	7.25709	0.308054	50.1397	17.329	226.537	84.8593	414.08	78.4624	834.718	140.009
17A10	0.0680417	17.1513	0.110561	1.72006	3.28411	0.271232	21.7316	7.55969	105.115	39.9671	207.429	40.3109	448.07	78.1558
17A10	0.243778	5.99923	0.295949	3.41953	5.08419	0.257825	29.2984	10.339	137.668	52.8729	271.241	53.8742	599.682	107.437
17A10	0.0973179	4.07804	0.167684	2.62593	7.0643	0.239314	54.2175	19.9477	280.614	108.285	553.01	108.821	1177.96	200.503
17A10	0.0510442	3.83707	0.100245	1.481	3.65611	0.151013	20.9038	7.77124	103.713	38.9567	200.01	39.0495	427.534	73.8984
17A10	0.480268	7.54423	0.516729	4.97004	6.86536	0.322954	35.8415	12.3894	162.027	59.3988	299.656	59.6045	657.657	114.264
17A10	0.139685	4.58282	0.190318	2.38562	4.55893	0.207479	27.6359	9.80243	130.32	49.5898	250.125	48.5995	520.963	90.9599
17A10	0.13277	8.75116	0.20194	2.87116	7.3808	0.260038	44.9125	15.9944	213.868	79.6641	389.943	74.571	788.8	131.504
17A10	0.0259682	4.82737	0.121183	2.49847	5.69909	0.246389	37.1051	12.905	168.484	63.8115	317.975	61.9685	671.018	114.957
17A10	0.100174	7.78674	0.388374	6.69185	13.5731	0.521574	75.2373	24.9577	314.03	115.441	562.691	104.674	1105.68	184.641
17A10	0.686589	7.02502	0.431041	3.82664	6.60059	0.318673	34.7674	11.9545	159.914	60.1584	298.657	57.5709	619.975	108.97
17A10	0.0383924	4.70245	0.131292	1.99085	4.26914	0.14835	26.0569	9.55012	125.789	48.2661	242.865	47.8318	518.341	89.2828
17A10	0.0473368	3.90561	0.159347	3.29626	6.63181	0.307807	38.3176	13.232	175.142	66.1279	328.946	63.8278	694.887	120.117
17A10	0.0024307	3.27616	0.0764253	1.50793	3.86867	0.189874	24.2424	8.56886	116.323	44.5415	230.372	46.3021	516.926	91.9575
17A10	0.00783313	2.35313	0.0448805	1.35475	3.16169	0.0966299	24.9615	9.00777	125.983	49.2645	252.275	49.7871	557.336	96.0211
17A10	19.6935	63.4003	8.77117	48.7506	21.4531	0.665021	67.2179	20.1232	244.53	86.9143	413.744	76.712	794.096	132.282
17A10	0.0149154	4.10952	0.202242	4.37272	8.44967	0.363061	48.6576	16.5094	207.286	75.9614	367.058	68.5506	724.002	122.319
17A10	0.0886472	4.34173	0.123224	1.44097	2.37582	0.28101	17.7622	7.03595	90.4063	36.5408	197.969	41.5468	485.695	86.8393
17A10	0.00394255	3.61556	0.0739304	1.44132	3.43864	0.154285	22.4705	8.1715	100.685	40.2221	198.922	38.6559	435.629	74.1773
17A10	0.0169238	3.70175	0.0392371	1.41007	3.82906	0.150038	26.4122	9.85013	133.599	52.447	273.681	54.8602	616.483	108.707

## Sheet: Table S5
Table S5 LA-ICP-MS U-Pb isotopic data of zircons from sample 17A27
Spot No.	Content (ppm)		Th/U	Isotopic Ratios						Age (Ma)						Concordance
	232Th	238U		207Pb/206Pb	1σ	207Pb/235U	1σ	206Pb/238U	1σ	207Pb/206Pb	1σ	207Pb/235U	1σ	206Pb/238U	1σ
17A27	633.282	1356.44	0.46687	0.0560121	0.0012971	0.413648	0.0102532	0.0539112	0.000680715	453.75	17.59	351.499	7.3647	338.489	4.1637	96%
17A27	88697.1	46735.7	1.89785	0.0623886	0.000193652	0.559618	0.0112345	0.0645963	0.00110939	687.05	7.4075	451.278	7.31429	403.518	6.71764	88%
17A27	48715.6	26530.8	1.83619	0.0623759	0.000347855	0.614586	0.0228223	0.0712691	0.00262359	687.05	11.11	486.448	14.3535	443.797	15.7876	90%
17A27	56896.9	21947.6	2.5924	0.0650983	0.000644959	0.672015	0.0233048	0.0734463	0.0016648	777.47	15.74	521.937	14.1535	456.885	9.99769	86%
17A27	39255.3	26226.8	1.49676	0.0617017	0.000217523	0.68838	0.00944878	0.0807252	0.000466254	664.83	7.4075	531.826	5.68251	500.45	2.78116	93%
17A27	32199.8	23718.4	1.35759	0.0621429	0.000243337	0.70829	0.012307	0.0822425	0.00126652	679.64	7.4075	543.73	7.31521	509.494	7.5441	93%
17A27	32314.9	14092.9	2.29299	0.0638017	0.000356414	0.764219	0.0126485	0.0861495	0.00103683	744.45	11.11	576.441	7.27989	532.724	6.15368	92%
17A27	25224.5	17172.7	1.46887	0.0648108	0.000392951	0.839144	0.0268356	0.0936855	0.00288615	768.52	16.82	618.673	14.8168	577.297	17.0116	93%
17A27	30704.4	42260.6	0.72655	0.0655392	0.000262132	0.854677	0.0168442	0.0938425	0.00155992	790.74	208.333	627.213	9.22195	578.222	9.1932	91%
17A27	8696.76	12967.3	0.67067	0.0667417	0.000496179	0.876389	0.027583	0.0943155	0.00249622	831.48	21.295	639.03	14.9273	581.009	14.7048	90%
17A27	59408.1	57204.3	1.03852	0.0654635	0.000213101	0.870875	0.0102988	0.095915	0.000820259	790.74	6.3275	636.042	5.58955	590.425	4.82494	92%
17A27	16461.8	12214.6	1.34771	0.0699004	0.000756653	0.938272	0.0147177	0.0983577	0.00160162	925.61	22.22	671.977	7.71019	604.777	9.40013	89%
17A27	35107.8	18199.2	1.92908	0.0643342	0.000329613	0.903054	0.018188	0.101174	0.00180811	753.71	11.11	653.358	9.70461	621.284	10.5849	94%
17A27	3415.3	6494.39	0.525884	0.065734	0.000711436	1.16575	0.0357826	0.128622	0.00401972	798.15	22.22	784.656	16.7777	780	22.9598	99%
17A27	2479.44	4621.05	0.536553	0.0659332	0.000816264	1.19862	0.0277934	0.131838	0.00254149	805.555	21.295	799.951	12.8364	798.342	14.4751	99%
17A27	5372.5	8193.8	0.655679	0.0637825	0.000470309	1.17931	0.0291928	0.132842	0.00277309	744.45	14.8125	790.991	13.6023	804.061	15.7802	98%
17A27	2935.08	5596.29	0.52447	0.065696	0.000794022	1.20801	0.0222751	0.133367	0.00189645	798.15	24.8425	804.276	10.2438	807.047	10.7867	99%
17A27	31089.4	17834.8	1.74319	0.0672191	0.000468785	1.25154	0.0336801	0.134836	0.00331557	855.55	13.73	824.101	15.1899	815.394	18.8341	98%
17A27	4368.08	6552.21	0.666658	0.0670403	0.000569559	1.25408	0.029338	0.134839	0.00279388	838.885	18.515	825.246	13.2165	815.415	15.8706	98%
17A27	1103.1	5080.71	0.217116	0.0662813	0.000712432	1.23284	0.0325541	0.134895	0.00342763	816.665	22.22	815.632	14.805	815.729	19.4696	99%
17A27	115.143	1267.9	0.0908146	0.0693083	0.000700666	1.47144	0.0220183	0.153164	0.000994046	909.26	20.37	918.72	9.04636	918.674	5.55692	99%

## Sheet: Table S6
Table S6 Trace elements data of zircons from sample 17A27
Spot No.	La	Ce	Pr	Nd	Sm	Eu	Gd	Tb	Dy	Ho	Er	Tm	Yb	Lu
17A27	1.37895	75.0605	0.281306	3.62936	5.51776	1.90519	31.5198	12.2783	167.438	68.2469	376.543	85.8928	1098.16	204.668
17A27	34.7205	711.671	18.8938	130.869	102.615	16.781	393.769	106.62	1119.43	349.585	1556.82	313.822	3528.55	545.559
17A27	10.6068	305.694	5.90934	54.3274	61.9794	7.90159	280.674	87.8044	1057.29	371.401	1798.22	366.597	4120.38	618.236
17A27	9.96501	153.736	6.4265	42.364	32.3298	12.4802	126.827	38.1936	490.602	196.821	1068.64	240.333	2919.18	492.606
17A27	13.0638	406.073	7.53685	69.5227	78.1749	7.33192	363.027	119.873	1424.36	501.353	2370.7	456.289	4752.27	670.46
17A27	4.4525	368.996	7.01519	74.8828	93.7819	17.5691	493.79	153.988	1841.83	631.291	2920.19	560.516	5860.39	860.23
17A27	82.2192	615.762	17.9182	124.559	96.3128	6.47515	387.228	111.844	1299.57	452.607	2183.48	436.218	4776.36	734.894
17A27	13.3892	254.989	12.1609	89.3405	64.4422	23.5039	249.36	76.894	960.14	335.654	1603.1	319.245	3517.05	533.912
17A27	4.10171	271.074	2.66192	28.7388	44.8446	3.04737	256.198	88.7087	1143.56	413.948	1988.71	380.906	3951.75	586.097
17A27	17.2277	169.19	7.6843	61.0034	57.0322	19.471	250.389	81.0546	1053.42	398.215	2070.1	447.859	5209.94	846.686
17A27	9.08364	93.9719	3.8429	35.4245	35.1501	16.1864	154.395	46.2926	548.104	197.336	973.414	208.041	2519.19	444.265
17A27	13.2494	295.315	6.03086	59.5947	77.8418	7.81656	398.74	126.979	1486.08	490.348	2134.18	395.052	3998.69	562.869
17A27	167.953	2215.35	285.501	1766.88	452.345	57.6344	456.711	67.1298	458.087	109.632	429.115	91.374	1138.43	171.572
17A27	8.90581	58.5348	1.67666	22.9362	29.3382	12.9294	131.512	45.0988	595.386	233.124	1266.78	281.369	3313.33	561.31
17A27	3.59664	65.8036	2.51321	28.4025	40.1766	7.18756	226.14	75.2896	946.134	338.096	1630.94	321.658	3417.41	543.736
17A27	6.32191	66.3154	4.37153	24.0791	14.3451	5.10369	45.9809	14.6851	192.579	82.8574	464.121	103.806	1257.74	218.403
17A27	2.8553	58.803	3.51463	40.0915	48.9007	12.4779	238.424	78.9188	978.812	363.353	1813.46	367.856	4049.8	678.201
17A27	2.54719	87.8263	2.92779	28.127	32.7741	22.3225	169.765	55.7247	697.965	266.705	1416.76	311.201	3774.83	614.223
17A27	7.01544	141.37	6.31127	69.2422	97.9591	14.7766	546.665	173.12	2083.49	705.623	3180.39	578.324	5685.99	833.478
17A27	14.8647	958.989	110.657	1772.7	1560.72	699.681	2090.77	319.619	2088.81	430.828	1387.24	211.714	1984.12	257.85
17A27	0.017428	2.41108	0.0640585	2.11311	7.87524	0.392184	69.3086	26.1117	305.918	95.3595	419.154	78.6377	811.272	127.894

## Sheet: Table S7
Table S7 LA-ICP-MS U-Pb isotopic data of zircons from sample 17A01
Spot No.	Content (ppm)		Th/U	Isotopic Ratios						Age (Ma)						Concordance
	232Th	238U		207Pb/206Pb	1σ	207Pb/235U	1σ	206Pb/238U	1σ	207Pb/206Pb	1σ	207Pb/235U	1σ	206Pb/238U	1σ
17A01	271.203	295.63	0.917375	0.074614	0.000851564	1.65579	0.0244574	0.159986	0.00121101	1057.41	22.99	991.768	9.35103	956.699	6.72998	96%
17A01	49.9152	126.288	0.395248	0.0764946	0.00128127	1.98012	0.0388587	0.188507	0.00219248	1109.26	33.335	1108.76	13.2406	1113.28	11.8919	99%
17A01	321.533	859.144	0.374248	0.0749783	0.000805643	1.82446	0.0351639	0.17556	0.00217979	1133.34	22.22	1054.29	12.642	1042.67	11.9533	98%
17A01	105.231	495.4	0.212416	0.0775793	0.000859633	1.97048	0.0267634	0.183334	0.00143527	1136.12	26.3925	1105.47	9.14864	1085.16	7.8189	98%
17A01	184.577	676.057	0.27302	0.0780961	0.000544481	2.00229	0.0197275	0.185585	0.0012836	1150.01	10.185	1116.29	6.67198	1097.41	6.97935	98%
17A01	188.023	297.815	0.631343	0.0791022	0.00111391	2.15488	0.036712	0.196666	0.00173791	1175.93	60.1825	1166.63	11.8161	1157.39	9.3621	99%
17A01	1157.23	1368.75	0.845468	0.079488	0.000679673	2.24642	0.0572555	0.20463	0.00501124	1184.26	49.0725	1195.67	17.9096	1200.14	26.8171	99%
17A01	47.7194	307.014	0.155431	0.080925	0.00198464	2.39419	0.188737	0.213915	0.0161925	1220.37	52.775	1240.86	56.5195	1249.64	85.9941	99%
17A01	804.934	1611.83	0.499392	0.0811189	0.000371053	2.33705	0.0284194	0.208099	0.00200862	1233.33	8.1775	1223.63	8.64752	1218.68	10.718	99%
17A01	209.769	619.952	0.338364	0.087062	0.000717603	2.46091	0.0317373	0.204344	0.0011898	1362.04	15.59	1260.63	9.31153	1198.61	6.36856	94%
17A01	107.876	269.452	0.400353	0.0880341	0.000839841	2.98289	0.0485715	0.245263	0.00261768	1383.34	23.15	1403.27	12.3833	1414	13.5511	99%
17A01	54.4222	114.73	0.474351	0.0891222	0.00194057	2.64739	0.0672457	0.21738	0.0040407	1406.48	41.515	1313.92	18.7224	1268.02	21.3968	96%
17A01	404.744	936.415	0.432227	0.0900144	0.000827996	3.06668	0.0703432	0.248051	0.00584893	1425.61	17.13	1424.41	17.5653	1428.42	30.211	99%
17A01	197.285	333.479	0.591598	0.0910413	0.000860342	2.96434	0.0402932	0.234545	0.00169931	1447.22	17.905	1398.53	10.3206	1358.27	8.8733	97%
17A01	307.811	375.614	0.819489	0.0915623	0.000700107	3.16745	0.0453149	0.250458	0.00224608	1458.34	14.505	1449.26	11.0412	1440.84	11.5791	99%
17A01	63.7604	148.812	0.428462	0.0925914	0.0013667	3.14013	0.0518949	0.245175	0.00223322	1479.63	27.775	1442.58	12.7281	1413.55	11.5617	97%
17A01	387.577	955.267	0.405726	0.0934339	0.000666309	3.69981	0.124532	0.286113	0.00980383	1498.15	13.425	1571.33	26.9111	1622.07	49.1409	96%
17A01	734.986	1403.43	0.523706	0.0940632	0.00149028	3.3423	0.102017	0.259003	0.00769414	1509.26	29.6325	1490.99	23.8596	1484.74	39.3965	99%
17A01	191.058	723.69	0.264006	0.0920025	0.000604864	2.87578	0.0353634	0.226284	0.00192294	1533.34	12.6525	1375.59	9.26482	1314.99	10.1087	95%
17A01	28.0212	105.56	0.265452	0.0964936	0.00229792	3.6666	0.103354	0.274069	0.00329662	1566.67	238.887	1564.13	22.492	1561.42	16.68	99%
17A01	182.957	185.512	0.986229	0.100387	0.000936907	3.84224	0.0681561	0.277114	0.00357549	1631.48	18.055	1601.64	14.2928	1576.81	18.0479	98%
17A01	105.04	258.076	0.407011	0.107278	0.00128339	4.45371	0.0785065	0.303106	0.00519249	1753.39	22.07	1722.39	14.6175	1706.69	25.6872	99%
17A01	48.7076	227.268	0.214317	0.177452	0.00109722	11.0178	0.150504	0.448361	0.00492883	2629.32	9.415	2524.64	12.7167	2387.96	21.9375	94%

## Sheet: Table S8
Table S8 LA-ICP-MS U-Pb isotopic data of zircons from sample 16A142
Spot No.	Content (ppm)		Th/U	Isotopic Ratios						Age (Ma)						Concordance
	232Th	238U		207Pb/206Pb	1σ	207Pb/235U	1σ	206Pb/238U	1σ	207Pb/206Pb	1σ	207Pb/235U	1σ	206Pb/238U	1σ
16A142	295.239	522.762	0.564768	0.0542066	0.00176506	0.415462	0.0170363	0.0553781	0.000515237	388.94	72.215	352.801	12.2216	347.456	3.14715	98%
16A142	70.9244	414.233	0.171218	0.0687751	0.00129948	1.40428	0.0525388	0.146692	0.00250944	892.28	38.89	890.746	22.1919	882.391	14.1075	99%
16A142	64.3086	309.683	0.20766	0.0703152	0.0011428	1.47634	0.0541537	0.150427	0.001166	938.885	33.335	920.73	22.2084	903.356	6.53368	98%
16A142	56.9073	665.147	0.085556	0.0742604	0.000783165	1.87779	0.0584902	0.182979	0.00128475	1050.01	20.835	1073.28	20.6402	1083.23	7.00102	99%
16A142	770.96	1470.39	0.524323	0.0756302	0.000805194	1.43415	0.04504	0.135973	0.000870588	1087.04	20.83	903.284	18.7902	821.85	4.94041	90%
16A142	66.1797	291.527	0.227011	0.0762266	0.00119427	2.02853	0.0622938	0.191936	0.00146616	1101.85	31.0225	1125.12	20.8883	1131.85	7.92955	99%
16A142	25.0352	89.8246	0.278711	0.0770115	0.0021508	2.10337	0.0786267	0.198009	0.0020312	1121.3	55.555	1149.91	25.7311	1164.62	10.9298	98%
16A142	806.023	854.787	0.942952	0.0785186	0.000713691	1.97575	0.0619379	0.180953	0.00107439	1161.12	23.145	1107.27	21.1374	1072.18	5.86473	96%
16A142	99.614	407.282	0.244582	0.0806079	0.000903203	2.34547	0.0723378	0.208832	0.00133673	1212.96	22.22	1226.18	21.9587	1222.59	7.12849	99%
16A142	95.1826	229.225	0.415236	0.0834967	0.00125946	2.58908	0.0835664	0.222989	0.00139262	1280.56	29.6325	1297.55	23.646	1297.65	7.34056	99%
16A142	89.0134	111.813	0.796091	0.0861272	0.0044468	2.66798	0.155221	0.223079	0.00309943	1342.59	100.002	1319.63	42.9947	1298.12	16.336	98%
16A142	210.119	595.898	0.352609	0.0864934	0.00101799	2.81044	0.0827276	0.234096	0.00176042	1349.99	22.225	1358.32	22.0482	1355.93	9.19573	99%
16A142	46.4786	312.347	0.148805	0.0866296	0.00107709	2.82043	0.0994827	0.234524	0.00359253	1353.7	24.0775	1360.98	26.4462	1358.16	18.7595	99%
16A142	54.7593	95.3283	0.574429	0.0876891	0.00238741	2.81045	0.116489	0.231314	0.00230613	1375.93	51.8525	1358.32	31.0508	1341.38	12.0735	98%
16A142	77.7829	156.746	0.496237	0.0881261	0.00133114	2.89063	0.0898687	0.236522	0.0019599	1387.04	23.61	1379.47	23.4583	1368.59	10.2176	99%
16A142	55.8426	269.986	0.206835	0.0883793	0.00120008	3.02893	0.0986243	0.245489	0.00156915	1390.74	25.9275	1414.94	24.8606	1415.17	8.12162	99%
16A142	219.838	710.506	0.309411	0.0890253	0.0010157	2.60605	0.0954737	0.20982	0.00146495	1405.56	22.22	1302.34	26.8895	1227.86	7.80585	94%
16A142	60.1253	163.332	0.368116	0.0890129	0.00159252	2.82214	0.0847073	0.229098	0.00180116	1405.56	34.415	1361.44	22.5069	1329.77	9.44681	97%
16A142	367.648	902.451	0.407388	0.0899656	0.000660493	3.0678	0.0848447	0.244369	0.00110202	1424.99	14.045	1424.69	21.1816	1409.37	5.70896	98%
16A142	282.859	537.858	0.525899	0.0932192	0.000853637	3.23289	0.110816	0.249332	0.00260992	1492.28	16.82	1465.08	26.5886	1435.03	13.4669	97%
16A142	72.6086	237.953	0.305138	0.0935745	0.00129833	3.25145	0.0983212	0.2496	0.00178092	1499.69	26.235	1469.52	23.4865	1436.41	9.18736	97%
16A142	69.8415	173.967	0.401463	0.0950818	0.00146264	3.31213	0.10112	0.2527	0.00255468	1531.49	28.2425	1483.91	23.8151	1452.38	13.1464	97%
16A142	132.722	246.463	0.538508	0.108119	0.00141791	4.636	0.127203	0.309498	0.00217453	1768.52	24.075	1755.77	22.9209	1738.24	10.7048	98%
16A142	45.5369	109.035	0.417637	0.157334	0.00198329	9.73783	0.294988	0.445456	0.00332073	2427.47	22.0675	2410.29	27.9014	2375.02	14.8097	98%

## Sheet: Table S9
Table S9 LA-ICP-MS U-Pb isotopic data of zircons from sample 16A96
Spot No.	Content (ppm)		Th/U	Isotopic Ratios						Age (Ma)						Concordance
	232Th	238U		207Pb/206Pb	1σ	207Pb/235U	1σ	206Pb/238U	1σ	207Pb/206Pb	1σ	207Pb/235U	1σ	206Pb/238U	1σ
16A96	329.528	552.644	0.596275	0.0623179	0.0013736	0.775737	0.0225562	0.0901535	0.000580832	684.89	46.2925	583.049	12.8986	556.445	3.43464	95%
16A96	65.3593	70.301	0.929707	0.0642026	0.00269699	0.815016	0.0387869	0.0925028	0.00139975	750.005	88.88	605.264	21.702	570.322	8.25935	94%
16A96	36.2597	116.414	0.311471	0.0710337	0.00183375	1.89576	0.0887787	0.19365	0.00177122	966.665	52.315	1079.6	31.1396	1141.12	9.56562	94%
16A96	145.197	488.445	0.297264	0.0722912	0.000825651	1.94727	0.0646141	0.193923	0.00124538	994.445	22.22	1097.51	22.2642	1142.59	6.72423	95%
16A96	56.0892	160.36	0.34977	0.0730398	0.00149989	1.7528	0.0647516	0.172824	0.00151137	1016.66	42.5925	1028.2	23.8883	1027.65	8.30725	99%
16A96	118.117	325.542	0.362832	0.0742957	0.00124863	1.81662	0.057603	0.176672	0.00144672	1050.01	33.335	1051.47	20.7686	1048.77	7.92587	99%
16A96	95.3171	206.279	0.462079	0.0743954	0.00149019	1.83776	0.0571007	0.178022	0.00128524	1053.71	39.66	1059.06	20.434	1056.16	7.03311	99%
16A96	31.0969	63.3328	0.491008	0.0754315	0.00252355	1.99379	0.0939511	0.1925	0.00228158	1079.63	66.67	1113.41	31.8752	1134.9	12.3338	98%
16A96	153.503	280.528	0.547193	0.076382	0.00126374	1.91259	0.0667478	0.18076	0.00131177	1105.56	33.335	1085.49	23.2736	1071.12	7.16167	98%
16A96	51.6242	117.996	0.437508	0.0770505	0.00200174	2.06035	0.0788292	0.194569	0.00183185	1124.08	51.545	1135.74	26.1603	1146.08	9.88547	99%
16A96	124.613	384.507	0.324085	0.077307	0.0011466	2.01998	0.0580623	0.188309	0.00138356	1129.33	29.63	1122.25	19.5242	1112.21	7.50563	99%
16A96	40.4801	149.413	0.270927	0.0773736	0.00161793	2.08271	0.0844386	0.193647	0.00155373	1131.49	41.8225	1143.13	27.8194	1141.1	8.39111	99%
16A96	53.5585	233.439	0.229433	0.0775754	0.00158711	1.90824	0.0654759	0.17714	0.00158815	1136.12	40.7425	1083.97	22.8641	1051.33	8.69725	96%
16A96	39.3182	134.717	0.291858	0.0778337	0.00187368	1.94341	0.0637768	0.181054	0.001563	1142.6	48.1475	1096.18	22.0044	1072.73	8.53113	97%
16A96	72.8718	229.714	0.317228	0.077883	0.00131572	2.41098	0.0824541	0.223087	0.00166442	1144.14	33.7975	1245.88	24.5498	1298.17	8.77251	95%
16A96	33.2574	95.9892	0.34647	0.0780077	0.00192741	2.03797	0.0733624	0.190119	0.00170065	1147.22	48.61	1128.28	24.5247	1122.02	9.21177	99%
16A96	40.9826	124.227	0.329901	0.0780659	0.00186687	2.0209	0.0819395	0.187546	0.00176817	1150.01	46.76	1122.56	27.5482	1108.07	9.59826	98%
16A96	51.5	131.304	0.39222	0.0784786	0.00221246	2.09345	0.0747598	0.193646	0.00202996	1158.95	56.0175	1146.66	24.5437	1141.1	10.963	99%
16A96	23.9438	96.1769	0.248956	0.0786983	0.00212654	1.90004	0.079789	0.174518	0.00156363	1164.82	53.24	1081.1	27.9433	1036.96	8.58206	95%
16A96	82.359	201.492	0.408746	0.0787249	0.00153839	2.08207	0.0670114	0.190579	0.00138658	1164.82	37.8025	1142.92	22.0803	1124.51	7.50769	98%
16A96	56.167	118.17	0.475307	0.0786539	0.00178177	2.27416	0.0864213	0.209159	0.00169108	1164.82	45.835	1204.31	26.8072	1224.34	9.01569	98%
16A96	54.9937	77.961	0.7054	0.0789347	0.00215874	2.538	0.1102	0.232717	0.00226523	1172.22	58.3325	1283	31.6368	1348.72	11.8459	95%
16A96	56.4317	177.638	0.317679	0.0794235	0.00167188	2.31588	0.0791888	0.211048	0.00154459	1183.34	46.445	1217.16	24.2537	1234.4	8.22187	98%
16A96	30.0769	47.0558	0.639175	0.0794923	0.00268237	2.472	0.117027	0.228106	0.0028678	1184.26	66.665	1263.88	34.2376	1324.56	15.0533	95%
16A96	53.4831	121.91	0.438711	0.0799371	0.0016578	2.48114	0.0888706	0.225392	0.00193067	1195.37	41.1975	1266.55	25.9275	1310.3	10.1567	96%
16A96	53.986	126.322	0.427367	0.0799779	0.00157932	2.5062	0.0958143	0.226602	0.00208124	1198.15	34.255	1273.83	27.7544	1316.67	10.938	96%
16A96	26.3909	129.301	0.204104	0.0800586	0.00167892	2.60617	0.0956255	0.235487	0.00227521	1198.15	36.1075	1302.38	26.9314	1363.19	11.8714	95%
16A96	93.7172	316.766	0.295856	0.0806174	0.00100489	2.33616	0.0698296	0.20904	0.00130563	1212.96	24.84	1223.35	21.2562	1223.7	6.96139	99%
16A96	146.281	470.332	0.311016	0.0826494	0.000871465	2.57774	0.0927513	0.224745	0.00116654	1261.11	20.37	1294.34	26.3292	1306.9	6.14003	99%
16A96	46.8084	185.709	0.252052	0.0831513	0.00141667	2.46107	0.0886217	0.213824	0.00152005	1272.52	33.335	1260.68	26.0049	1249.16	8.07272	99%
16A96	55.3807	126.436	0.438013	0.0834146	0.0019178	2.38336	0.0978237	0.207259	0.00203496	1279.63	44.445	1237.62	29.3662	1214.2	10.8661	98%
16A96	40.2005	96.409	0.416979	0.0838417	0.00193653	2.6144	0.108434	0.225507	0.0024128	1288.58	44.7525	1304.69	30.4713	1310.91	12.6918	99%
16A96	119.176	164.532	0.724335	0.0847005	0.00176102	2.45874	0.0743877	0.208528	0.00155048	1309.26	36.11	1259.99	21.8414	1220.97	8.27043	96%
16A96	59.4229	113.956	0.521455	0.0846648	0.00191445	2.61127	0.0907964	0.223907	0.00216634	1309.26	43.055	1303.81	25.5347	1302.49	11.4103	99%
16A96	26.4563	59.7353	0.442891	0.0846538	0.00250252	2.80334	0.112063	0.238408	0.0028298	1309.26	57.4075	1356.43	29.9262	1378.42	14.7303	98%
16A96	59.6019	198.489	0.300278	0.0853875	0.00143266	2.7961	0.0994011	0.23641	0.00199344	1324.07	37.5	1354.5	26.5939	1368.01	10.3935	99%
16A96	80.5811	161.321	0.499507	0.0856322	0.00156687	2.84665	0.0803342	0.239559	0.00172887	1331.48	35.1825	1367.93	21.2085	1384.4	8.9911	98%
16A96	107.328	494.221	0.217166	0.0860059	0.000895186	2.9698	0.0866625	0.248109	0.00143211	1338.88	20.06	1399.92	22.1698	1428.72	7.39675	97%
16A96	41.545	103.966	0.399603	0.0861786	0.00244148	2.63171	0.115088	0.22297	0.00208071	1342.59	54.475	1309.54	32.1879	1297.55	10.9677	99%
16A96	113.909	570.555	0.199646	0.088827	0.000765641	3.07566	0.0696172	0.249426	0.0015972	1411.11	16.51	1426.65	17.3456	1435.51	8.24075	99%
16A96	86.5609	254.219	0.340498	0.089591	0.00117099	3.07402	0.102968	0.246431	0.00229945	1416.66	25.465	1426.24	25.6685	1420.04	11.8926	99%
16A96	73.4357	250.182	0.293529	0.0900494	0.00121934	2.97246	0.113092	0.237653	0.00180747	1427.78	21.3	1400.6	28.9148	1374.48	9.41437	98%
16A96	42.1913	112.707	0.374346	0.0908051	0.00188201	3.11015	0.097038	0.248247	0.00233026	1442.6	40.28	1435.2	23.977	1429.43	12.0343	99%
16A96	27.4257	57.4903	0.477049	0.0908705	0.00334558	2.68257	0.118898	0.214823	0.00294288	1444.14	75	1323.67	32.7947	1254.46	15.6163	94%
16A96	60.2549	70.0918	0.859656	0.0910199	0.00293659	2.75982	0.107626	0.220746	0.00276149	1447.22	61.42	1344.75	29.0735	1285.81	14.5827	95%
16A96	93.0989	331.662	0.280704	0.0911296	0.00115944	2.91539	0.095641	0.23097	0.00166007	1450.01	24.0775	1385.91	24.8076	1339.58	8.69356	96%
16A96	103.524	234.755	0.44099	0.091731	0.00139115	2.73052	0.100336	0.213675	0.00455051	1462.04	33.485	1336.8	27.3163	1248.36	24.1701	93%
16A96	142.708	297.847	0.479131	0.0922598	0.00112882	2.7892	0.104904	0.217663	0.00164261	1472.53	22.9925	1352.65	28.1182	1269.52	8.69611	93%
16A96	255.631	505.252	0.505947	0.09278	0.00128303	2.6655	0.0814141	0.206394	0.00166617	1483.34	25.925	1318.95	22.5563	1209.58	8.90326	91%
16A96	335.747	474.146	0.708108	0.0928294	0.00097609	3.01531	0.0841041	0.233761	0.00113461	1484.26	20.3675	1411.5	21.2712	1354.18	5.92832	95%
16A96	62.934	130.275	0.483088	0.0938525	0.0019535	3.3371	0.0992572	0.257173	0.00213607	1505.56	39.505	1489.78	23.2417	1475.36	10.9531	99%
16A96	65.2825	165.585	0.394253	0.094138	0.00142243	3.39948	0.113118	0.261546	0.00204525	1510.8	27.935	1504.28	26.113	1497.75	10.4511	99%
16A96	59.2124	243.185	0.243486	0.0943629	0.00137299	3.44565	0.10838	0.262907	0.00192569	1516.66	27.3175	1514.88	24.7589	1504.7	9.82956	99%
16A96	48.0234	218.852	0.219433	0.0948557	0.00135593	3.33215	0.0939041	0.25293	0.00169108	1525	27.78	1488.62	22.013	1453.57	8.70071	97%
16A96	9.00196	17.711	0.508268	0.0951	0.00547364	3.22568	0.197401	0.253848	0.00494132	1531.49	108.795	1463.35	47.4678	1458.29	25.4049	99%
16A96	46.0123	129.63	0.35495	0.0952969	0.00188177	3.48683	0.118911	0.265472	0.00218042	1544.45	37.0375	1524.24	26.9161	1517.78	11.1072	99%
16A96	63.3699	95.0253	0.666874	0.0971654	0.00220899	3.46561	0.105063	0.259189	0.00226565	1572.22	42.5875	1519.42	23.8936	1485.69	11.599	97%
16A96	194.284	341.139	0.569516	0.0977585	0.00118768	3.81066	0.132579	0.28098	0.00288967	1583.34	23.3025	1595	27.9904	1596.29	14.542	99%
16A96	95.2661	209.806	0.454068	0.0982188	0.00130345	3.86698	0.112847	0.283957	0.00196295	1590.74	25.46	1606.82	23.5471	1611.26	9.85549	99%
16A96	65.3152	103.37	0.631858	0.0992683	0.00218553	3.50624	0.114202	0.256206	0.00216391	1610.18	41.045	1528.62	25.7384	1470.4	11.1044	96%
16A96	171.193	286.482	0.59757	0.0993796	0.00114581	3.82484	0.128933	0.27823	0.00210101	1612.96	22.065	1597.99	27.1404	1582.44	10.5959	99%
16A96	211.321	315.358	0.670099	0.0995151	0.00112059	3.86325	0.120539	0.280109	0.00214393	1616.66	20.83	1606.04	25.1721	1591.91	10.7965	99%
16A96	71.6539	123.715	0.579184	0.0995139	0.00195307	4.03097	0.123411	0.290962	0.00290182	1616.66	31.015	1640.46	24.9126	1646.33	14.4903	99%
16A96	622.982	523.672	1.18964	0.10019	0.000946553	3.8784	0.120565	0.279019	0.00186861	1627.78	22.6825	1609.2	25.0994	1586.42	9.41805	98%
16A96	78.7635	178.83	0.440438	0.100284	0.00153788	4.18645	0.143428	0.301038	0.00228798	1629.32	-171.145	1671.37	28.0869	1696.45	11.3366	98%
16A96	81.1264	112.713	0.719764	0.0999779	0.00193367	3.74588	0.131839	0.270092	0.00287933	1633.33	35.795	1581.23	28.2142	1541.27	14.6142	97%
16A96	312.619	627.881	0.497896	0.102221	0.000724909	4.17343	0.129116	0.294071	0.00173935	1665.12	14.045	1668.82	25.3468	1661.84	8.66457	99%
16A96	51.2958	139.17	0.368583	0.103953	0.00172609	4.16023	0.113915	0.289104	0.00247503	1695.99	31.3275	1666.22	22.4188	1637.05	12.3769	98%
16A96	200.777	148.04	1.35623	0.106082	0.00207641	4.2932	0.165622	0.2934	0.00224376	1733.02	35.3375	1692.06	31.7813	1658.5	11.1831	97%
16A96	45.731	117.746	0.388386	0.106329	0.00181244	4.6593	0.133748	0.316517	0.00300757	1738.88	31.325	1759.96	24.0013	1772.7	14.7268	99%
16A96	115.07	512.786	0.224402	0.106482	0.00079997	4.30183	0.132361	0.29062	0.00149353	1739.81	13.1175	1693.71	25.3544	1644.62	7.45993	97%
16A96	399.53	365.624	1.09274	0.11323	0.00099432	5.5168	0.184096	0.351353	0.00252251	1853.71	48.61	1903.22	28.6917	1941.06	12.0333	98%
16A96	87.3212	278.923	0.313065	0.113782	0.00118115	5.52654	0.148216	0.350336	0.00243807	1861.12	18.5175	1904.73	23.0631	1936.2	11.6392	98%
16A96	134.671	120.825	1.11459	0.115245	0.00177457	5.32758	0.182809	0.332134	0.00321567	1883.64	32.4075	1873.3	29.3435	1848.71	15.5612	98%
16A96	230.772	540.546	0.426924	0.143129	0.000888401	7.9059	0.204667	0.396245	0.00260708	2265.13	10.8025	2220.35	23.3388	2151.73	12.0368	96%
16A96	171.65	249.9	0.686876	0.174638	0.00131507	12.8242	0.318653	0.530102	0.00337946	2602.78	13.425	2666.82	23.4091	2741.88	14.2379	97%
16A96	55.6185	70.2359	0.791882	0.178213	0.00237115	12.408	0.383222	0.501244	0.00418137	2636.11	22.225	2635.78	29.0292	2619.14	17.955	99%
16A96	66.3689	72.0379	0.921306	0.179699	0.00229984	12.6282	0.373207	0.507513	0.0045083	2650.31	21.7625	2652.33	27.8131	2646	19.2784	99%
16A96	78.1859	182.233	0.429044	0.18052	0.00155555	12.1412	0.275533	0.484342	0.00340974	2657.72	14.1975	2615.38	21.2927	2546.15	14.8083	97%

## Sheet: Table S10
Table S10 LA-ICP-MS U-Pb isotopic data of zircons from sample 17A30
Spot No.	Content (ppm)		Th/U	Isotopic Ratios						Age (Ma)						Concordance
	232Th	238U		207Pb/206Pb	1σ	207Pb/235U	1σ	206Pb/238U	1σ	207Pb/206Pb	1σ	207Pb/235U	1σ	206Pb/238U	1σ
17A30	283.661	1096.07	0.258798	0.0777096	0.000521693	2.04956	0.0354904	0.190794	0.00264299	1138.89	12.9625	1132.15	11.8174	1125.68	14.3079	99%
17A30	25.8723	494.076	0.052365	0.0794303	0.000747946	2.21032	0.0408688	0.201796	0.0032672	1183.34	50.9225	1184.31	12.927	1184.96	17.5252	99%
17A30	286.015	479.147	0.596925	0.0828682	0.00210388	2.44015	0.125911	0.213276	0.00795864	1266.35	50	1254.52	37.18	1246.25	42.2867	99%
17A30	49.673	98.4313	0.504646	0.0852262	0.00151373	2.61611	0.0538114	0.22137	0.00175032	1320.37	33.7925	1305.17	15.111	1289.11	9.23824	98%
17A30	235.6	184.578	1.27643	0.0827253	0.00166789	2.57549	0.0974327	0.222898	0.00647389	1262.65	34.26	1293.7	27.6762	1297.17	34.127	99%
17A30	1.36267	88.1051	0.0154664	0.0795362	0.00174529	2.4541	0.0620292	0.224036	0.00300995	1187.04	42.5875	1258.63	18.2363	1303.17	15.852	96%
17A30	54.9429	139.83	0.392927	0.0853864	0.00204985	2.63878	0.0685215	0.224461	0.00345178	1324.07	46.605	1311.52	19.1228	1305.4	18.1726	99%
17A30	111.305	317.782	0.350256	0.0840108	0.00110169	2.69354	0.0589832	0.230382	0.00344027	1294.44	20.2175	1326.68	16.2163	1336.5	18.0249	99%
17A30	125.422	276.202	0.454096	0.0888326	0.000944138	2.88151	0.0445315	0.23448	0.00175611	1411.11	20.37	1377.09	11.6497	1357.94	9.17036	98%
17A30	198.057	415.265	0.476941	0.0859868	0.000909453	2.80675	0.0792885	0.236696	0.00644118	1338.88	20.37	1357.34	21.1518	1369.5	33.5756	99%
17A30	88.988	211.751	0.420248	0.0908192	0.00208883	3.03531	0.0898363	0.244841	0.0074132	1442.6	44.445	1416.54	22.6088	1411.82	38.3897	99%
17A30	270.3	770.474	0.350824	0.0910774	0.0011774	3.12725	0.101125	0.245151	0.0065137	1450.01	19.5975	1439.42	24.8837	1413.42	33.7231	98%
17A30	556.414	804.303	0.691796	0.0885683	0.00047963	3.00787	0.0398738	0.245425	0.00133568	1394.75	10.6475	1409.62	10.1022	1414.84	6.91357	99%
17A30	248.153	824.549	0.300956	0.0899299	0.00073714	3.076	0.0470977	0.246201	0.00273685	1433.34	15.2775	1426.73	11.7332	1418.86	14.1573	99%
17A30	142.921	262.531	0.544397	0.0903795	0.00153997	3.10523	0.0858135	0.247868	0.00444354	1435.19	27.3175	1433.99	21.2281	1427.47	22.9552	99%
17A30	114.706	161.115	0.711952	0.101328	0.00154857	3.51432	0.0647992	0.250696	0.00200081	1649.99	28.24	1530.44	14.576	1442.06	10.3127	94%
17A30	198.184	457.223	0.433453	0.0884255	0.00090392	3.07465	0.0695386	0.251733	0.00522029	1391.66	20.3675	1426.4	17.3304	1447.41	26.8846	98%
17A30	155.335	1242.56	0.125012	0.0939164	0.000553362	3.34113	0.0633055	0.257244	0.00431586	1506.48	11.11	1490.72	14.8081	1475.72	22.1293	98%
17A30	164.017	426.167	0.384865	0.094286	0.00124589	3.49546	0.0993706	0.26548	0.00528541	1513.88	25.1575	1526.19	22.4483	1517.82	26.9243	99%
17A30	81.6702	361.332	0.226025	0.0929502	0.000932629	3.42101	0.0647738	0.265693	0.00330975	1487.04	-13.735	1509.23	14.8778	1518.9	16.8572	99%
17A30	102.323	491.513	0.208179	0.0990508	0.000884209	3.81884	0.067874	0.279466	0.00448564	1606.48	21.295	1596.72	14.3027	1588.67	22.6004	99%
17A30	152.377	196.686	0.774719	0.100203	0.000913535	4.12186	0.0658784	0.297531	0.00264877	1628.09	22.375	1658.65	13.0608	1679.05	13.1597	98%
17A30	306.167	545.314	0.56145	0.107775	0.00135365	4.62481	0.109671	0.308485	0.00453875	1762.04	22.845	1753.76	19.8001	1733.25	22.3608	98%

[truncated: 4 more sheets: Table S11, Table S12, Table S13, Table S14]
